# Supplementary material
Source: MDPI journal article supplement (https://www.mdpi.com/2073-4395/11/2/217)
Supplement: s1 [file s1]

## Supplementary-1

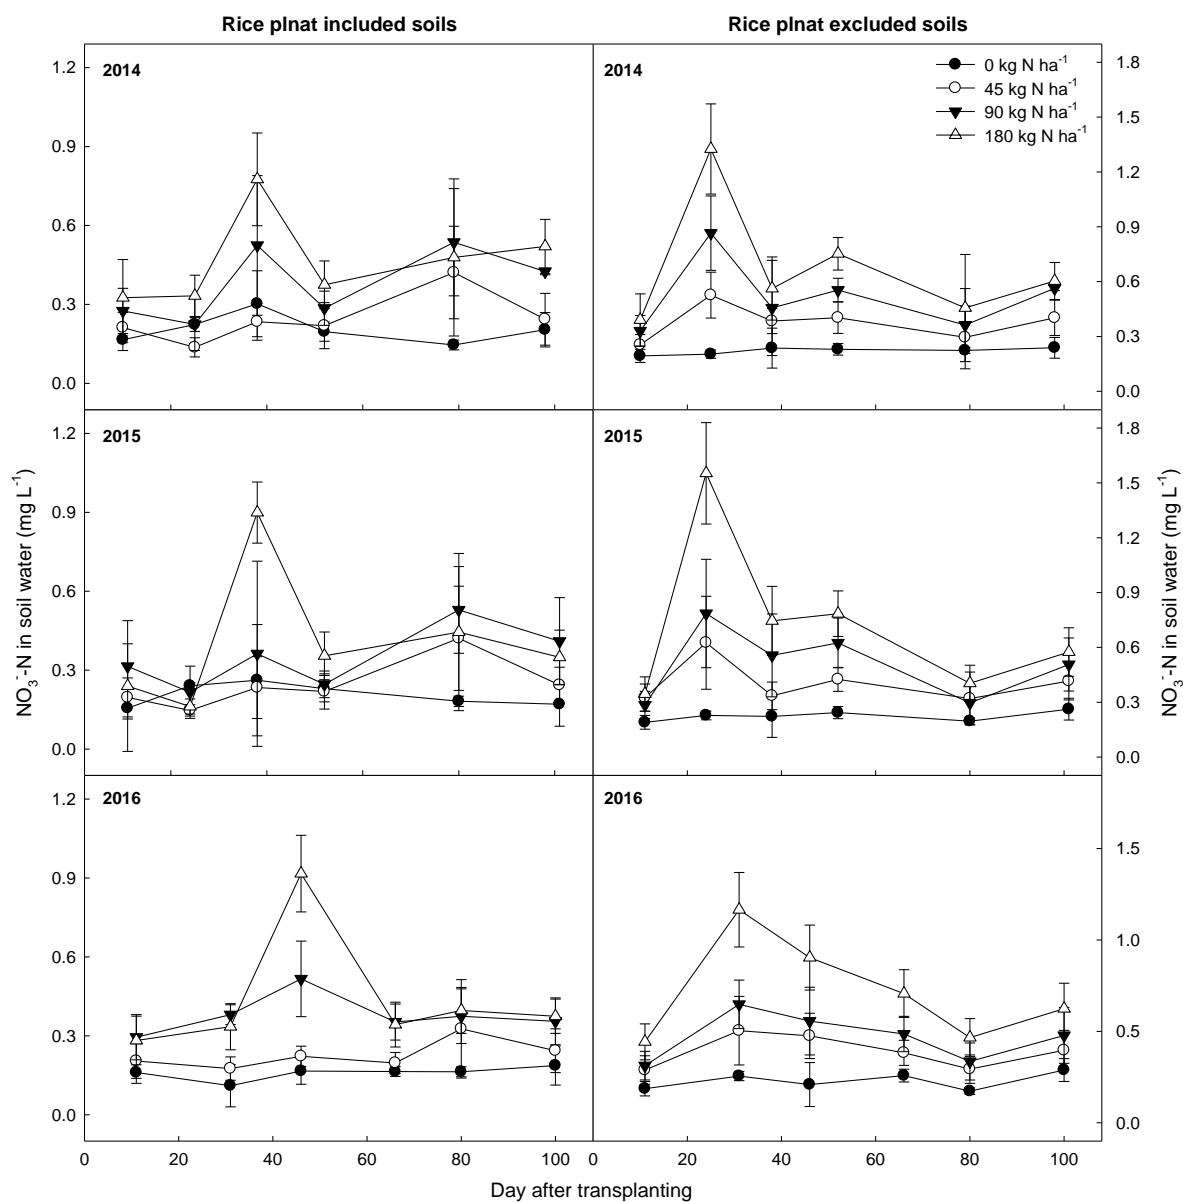

**Figure S1.** Changes in NO<sub>3</sub>-N concentration in rice plant included and excluded soils under different levels of N fertilizer application.
